# Supplementary material for: First Complete Mitochondrial Genome of Melyridae(Coleoptera, Cleroidea): Genome Description and Phylogenetic Implications
Source: PubMed Central journal article supplement (PMC7909412; doi:10.3390/insects12020087), 2021-01-20
Supplement: insects-12-00087-s001.pdf [file insects-12-00087-s001.pdf]

**Table S1.** The optimal partition schemes and the best-fit replacement models for the Bayesian Inference (BI)

| Partitions | Models    | Genes                                             |
|------------|-----------|---------------------------------------------------|
| P1         | GTR+F+I+G | atp6_pos1,cox2_pos1,cox3_pos1,cytb_pos1,nad3_pos1 |
| P2         | GTR+F+I+G | atp6_pos2,cox1_pos2,cox2_pos2,cox3_pos2,cytb_pos2 |
| P3         | HKY+F+I+G | atp6_pos3                                         |
| P4         | GTR+F+I+G | atp8_pos1,nad2_pos1,nad6_pos1                     |
| P5         | GTR+F+G   | atp8_pos2,nad2_pos2,nad3_pos2,nad6_pos2           |
| P6         | HKY+F+G   | atp8_pos3,cox1_pos3,cox2_pos3,cox3_pos3,cytb_pos3 |
| P7         | GTR+F+G   | cox1_pos1                                         |
| P8         | GTR+F+I+G | nad1_pos1, nad4_pos1, nad14l_pos1, nad5_pos1      |
| P9         | GTR+F+I+G | nad1_pos2, nad4_pos2, nad14l_pos2, nad5_pos2      |
| P10        | HKY+F+G   | nad1_pos3                                         |
| P11        | HKY+F+G   | nad2_pos3                                         |
| P12        | HKY+F+G   | nad3_pos3                                         |
| P13        | HKY+F+G   | nad4_pos3                                         |
| P14        | HKY+F+G   | nad4l_pos3                                        |
| P15        | HKY+F+G   | nad5_pos3                                         |
| P16        | HKY+F+G   | nad6_pos3                                         |

**Table S2.** The optimal partition schemes and the best-fit replacement models for the Maximum Likelihood (ML)

| Partitions | Models    | Genes               |
|------------|-----------|---------------------|
| P1         | GTR+F+I+G | atp6,cox1,cox2,cox3 |
| P2         | HKY+F+G   | atp8                |
| P3         | GTR+F+I+G | Cytb,nad3           |
| P4         | TIM+F+I+G | nad1                |
| P5         | TVM+F+I+G | nad2                |
| P6         | GTR+F+I+G | nad4L               |
| P7         | GTR+F+I+G | nad4                |
| P8         | TIM+F+I+G | nad6                |

**Table S3.** Summary of the characteristics of the mitogenome of *Cordylepherus* sp.

| Feature | Strand | Location  | Size<br>(bp) | Start<br>Codon | Stop<br>Codon | Anticodon | Intergenic<br>Nucleotides |
|---------|--------|-----------|--------------|----------------|---------------|-----------|---------------------------|
| trnI    | J      | 1–65      | 65           |                |               | AAT       | 0                         |
| trnQ    | N      | 65–132    | 68           |                |               | GTA       | -1                        |
| trnM    | J      | 133–201   | 69           |                |               | AAA       |                           |
| nad2    | J      | 202–1180  | 979          | ATA            | T             |           |                           |
| trnW    | J      | 1181–1245 | 65           |                |               | AAG       |                           |
| trnC    | N      | 1255–1317 | 63           |                |               | GAT       | 9                         |
| trnY    | N      | 1320–1383 | 64           |                |               | ATC       | 2                         |

|        |   |             |       |     |     |  |     |  |    |
|--------|---|-------------|-------|-----|-----|--|-----|--|----|
| cox1   | J | 1418–2915   | 1498  | ATT | T   |  |     |  | 34 |
| trnL2  | J | 2916–2980   | 65    |     |     |  | TCT |  |    |
| cox2   | J | 2981–3661   | 681   | ATA | TAA |  |     |  |    |
| trnK   | J | 3663–3733   | 71    |     |     |  | CAT |  | 1  |
| trnD   | J | 3733–3797   | 65    |     |     |  | AAA |  | -1 |
| atp8   | J | 3798–3956   | 159   | ATC | TAA |  |     |  |    |
| atp6   | J | 3956–4615   | 660   | ATA | TAA |  |     |  | -1 |
| cox3   | J | 4618–5400   | 783   | ATA | TAA |  |     |  | 2  |
| trnG   | J | 5404–5470   | 67    |     |     |  | ATT |  | 3  |
| nad3   | J | 5475–5820   | 346   | ATA | T   |  |     |  | 4  |
| trnR   | J | 5821–5886   | 66    |     |     |  | AAA |  |    |
| trnA   | J | 5890–5954   | 65    |     |     |  | AGG |  | 3  |
| trnN   | J | 5955–6020   | 66    |     |     |  | TTA |  |    |
| trnS1  | J | 6021–6087   | 67    |     |     |  | GAA |  |    |
| trnE   | J | 6090–6153   | 64    |     |     |  | ATT |  | 2  |
| trnF   | N | 6152–6217   | 66    |     |     |  | AGT |  | -2 |
| nad5   | N | 6218–7928   | 1711  | ATA | T   |  |     |  |    |
| trnH   | N | 7926–7989   | 64    |     |     |  | AAT |  | -3 |
| nad4   | N | 7990–9320   | 1331  | ATA | TA  |  |     |  |    |
| nad4L  | N | 9317–9574   | 258   | ATA | TAA |  |     |  | -4 |
| trnT   | J | 9595–9659   | 65    |     |     |  | GTT |  | 20 |
| trnP   | J | 9660–9725   | 66    |     |     |  | CTG |  |    |
| nad6   | J | 9727–10233  | 507   | ATA | TAA |  |     |  | 1  |
| cytb   | J | 10233–11367 | 1135  | ATG | T   |  |     |  | -1 |
| tRNAS2 | J | 11368–11433 | 66    |     |     |  | AAT |  |    |
| nad1   | N | 11451–12398 | 948   | TTG | TAG |  |     |  | 17 |
| trnL2  | N | 12399–12463 | 65    |     |     |  | AAT |  |    |
| rrnL   | N | 12464–13748 | 1285  |     |     |  |     |  |    |
| trnV   | N | 13749–13815 | 67    |     |     |  | TTG |  |    |
| rrnS   | N | 13816–14630 | 815   |     |     |  |     |  |    |
| CR     | J | 14631–15824 | >1194 |     |     |  |     |  |    |

Note: the “J” indicates the majority strand and the “N” indicates the minority strand in the strand column.

**Table S4.** Nucleotide composition and skewness of the mitogenomes of *Cordylepherus* sp.

|             | Size<br>(bp) | A      | T      | G     | C      | A + T  | G + C  | AT-skew | GC-skew |
|-------------|--------------|--------|--------|-------|--------|--------|--------|---------|---------|
| Full genome | 15,824       | 41.90% | 39.20% | 7.80% | 11.20% | 81.1%  | 19.00% | 0.03    | -0.18   |
| PCGs        | 10,996       | 41.50% | 38.20% | 8.50% | 11.80% | 79.70% | 20.30% | 0.04    | -0.16   |
| rRNA genes  | 2,100        | 43.10% | 41.40% | 5.30% | 10.20% | 84.50% | 15.50% | 0.02    | -0.32   |
| tRNA genes  | 1,449        | 43.90% | 37.80% | 7.70% | 10.60% | 81.70% | 18.30% | 0.07    | -0.16   |
| CR          | 1,194        | 43.90% | 46.10% | 4.50% | 5.40%  | 90.0%  | 10.0%  | -0.02   | -0.09   |

**Table S5.** Codon number and RSCU in the mitogenomes of Melyridae species (*Cordylepherus* sp. / *Clanoptilus assimilis* / Malachiinae sp. / Dasytinae sp.)

| Codon  | Count               | RSCU                    | Codon  | Count             | RSCU                    | Codon  | Count                | RSCU                    |
|--------|---------------------|-------------------------|--------|-------------------|-------------------------|--------|----------------------|-------------------------|
| UUU(F) | 343/331/<br>327/333 | 1.88/1.8/<br>1.82/1.86  | UCU(S) | 98/94/<br>114/109 | 2.5/2.36/<br>2.83/2.67  | UAU(Y) | 160/149/<br>159/ 160 | 1.77/1.74<br>1.74/1.81  |
| UUC(F) | 22/36/<br>33/26     | 0.12/0.2<br>0.18/0.14   | UCC(S) | 2/ 10/<br>11/ 10  | 0.05/0.25/<br>0.27/0.25 | UAC(Y) | 21/ 22/<br>24/ 17    | 0.23/0.26/<br>0.26/0.19 |
| UUA(L) | 502/471/<br>469/475 | 5.11/4.79/<br>4.8/ 4.9  | UCA(S) | 93/ 89/<br>68/ 92 | 2.38/2.23<br>1.69/2.26  | UAA(*) | 6/ 11/<br>9/ 8       | 1.71/1.83/<br>1.8/ 1.45 |
| UUG(L) | 21/ 30/<br>37 14    | 0.21/0.31/<br>0.38/0.14 | UCG(S) | 3/ 6/<br>4/3      | 0.08/0.15<br>0.1/ 0.07  | UAG(*) | 1/1/<br>1/3          | 0.29/0.17/<br>0.2/ 0.55 |
| CUU(L) | 36/ 35/<br>42/ 46   | 0.37/0.36/<br>0.43/0.47 | CCU(P) | 76/ 70/<br>75/ 78 | 2.45/2.26<br>2.4/ 2.38  | CAU(H) | 58/ 55/<br>58/ 60    | 1.78/1.59/<br>1.71/1.69 |
| CUC(L) | 0/ 7/<br>0/ 3       | 0/ 0.07/<br>0/ 0.03     | CCC(P) | 7/ 11/<br>12/ 12  | 0.23/0.35<br>0.38/0.37  | CAC(H) | 7/ 14/<br>10/ 11     | 0.22/0.41<br>0.29/0.31  |
| CUA(L) | 29/ 46/<br>35/ 44   | 0.3/ 0.47/<br>0.36/0.45 | CCA(P) | 39/ 41/<br>35/39  | 1.26/1.32<br>1.12/1.19  | CAA(Q) | 63/ 61/<br>57/ 59    | 1.88/1.85/<br>1.87/1.87 |
| CUG(L) | 1/ 1/<br>3/0        | 0.01/0.01/<br>0.03/0    | CCG(P) | 2/ 2/<br>3/2      | 0.06/0.06<br>0.1/ 0.06  | CAG(Q) | 4/ 5/<br>4/ 4        | 0.12/0.15<br>0.13/0.13  |
| AUU(I) | 405/398<br>393/372  | 1.91/1.85/<br>1.84/1.84 | ACU(T) | 77/ 66/<br>77/ 80 | 1.99/1.71<br>1.99/2.01  | AAU(N) | 205/207/<br>188/193  | 1.83/1.86/<br>1.72/ 1.8 |
| AUC(I) | 18/ 32/<br>35 / 33  | 0.09/0.15/<br>0.16/0.16 | ACC(T) | 4/ 14/<br>13/ 13  | 0.1/0.36/<br>0.34/0.33  | AAC(N) | 19/ 15 /<br>31/21    | 0.17/0.14<br>0.28/ 0.2  |
| AUA(M) | 265/263/<br>254/270 | 1.89/1.79/<br>1.8/ 1.9  | ACA(T) | 71/ 70/<br>61/ 65 | 1.83/1.82<br>1.57/1.64  | AAA(K) | 98/ 99/<br>111/104   | 1.8/ 1.78/<br>1.82/1.78 |
| AUG(M) | 15/ 31/<br>28/ 14   | 0.11/0.21/<br>0.2/ 0.1  | ACG(T) | 3/ 4/<br>4/1      | 0.08/0.1/<br>0.1/ 0.03  | AAG(K) | 11/ 12/<br>11/ 13    | 0.2/ 0.22/<br>0.18/0.22 |
| GUU(V) | 71/ 69/<br>80/ 81   | 2.01/1.85/<br>2.27/2.08 | GCU(A) | 65/ 64/<br>61/ 71 | 1.98/1.98<br>2.09/1.96  | GAU(D) | 48/ 42/<br>58/ 53    | 1.63/1.38/<br>1.73/1.68 |
| GUC(V) | 5/ 6/<br>7/6        | 0.14/0.16/<br>0.2/ 0.15 | GCC(A) | 10/ 20/<br>12/ 14 | 0.31/0.62<br>0.41/0.39  | GAC(D) | 11/ 19/<br>9/ 10     | 0.37/0.62/<br>0.27/0.32 |
| GUA(V) | 60/ 65/<br>46/ 61   | 1.7/ 1.74/<br>1.3/ 1.56 | GCA(A) | 53/ 44/<br>40/ 58 | 1.62/1.36<br>1.37/ 1.6  | GAA(E) | 68/ 66/<br>60/ 64    | 1.81/1.71<br>1.69/1.75  |
| GUG(V) | 5/ 9/<br>8/8        | 0.14/0.24/<br>0.23/0.21 | GCG(A) | 3/ 1/<br>4/2      | 0.09/0.03<br>0.14/0.06  | GAG(E) | 7/ 11/<br>11/ 9      | 0.19/0.29/<br>0.31/0.25 |
| AGA(S) | 91/87/<br>83/ 82    | 2.33/2.18/<br>2.06/2.01 | AGU(S) | 25/31/<br>31/21   | 0.64/0.78<br>0.77/0.52  | UGU(C) | 27/26/<br>32/ 33     | 1.8/1.73/<br>1.94/1.94  |
| AGG(S) | 1/1/<br>6/4         | 0.03/0.03/<br>0.15/ 0.1 | AGC(S) | 0/1/<br>5/5       | 0/ 0.03/<br>0.12/0.12   | UGC(C) | 3/ 4/<br>1/1         | 0.2/ 0.27<br>0.06/0.06  |
| GGU(G) | 50/32/<br>38/ 35    | 1.1/ 0.7/<br>0.84/ 0.7  | CGU(R) | 17/21/<br>15/ 21  | 1.28/1.58<br>1.15/1.62  | UGA(W) | 84/83/<br>89/ 91     | 1.87/1.82/<br>1.84/ 1.9 |
| GGC(G) | 4/ 11/<br>          | 0.09/0.24/<br>          | CGC(R) | 0/2/<br>          | 0/ 0.15/<br>            | UGG(W) | 6/8/<br>             | 0.13/0.18<br>           |

|        |          |            |        |        |            |  |     |           |
|--------|----------|------------|--------|--------|------------|--|-----|-----------|
|        | 6/ 12    | 0.13/0.24  |        | 5/2    | 0.38/0.15  |  | 8/5 | 0.16/ 0.1 |
| GGA(G) | 112/100/ | 2.46/2.17/ | CGA(R) | 36/26/ | 2.72/1.96/ |  |     |           |
|        | 99/ 120  | 2.18/2.39  |        | 25/ 27 | 1.92/2.08  |  |     |           |
| GGG(G) | 16/ 41/  | 0.35/0.89  | CGG(R) | 0/ 4/  | 0/ 0.3/    |  |     |           |
|        | 39/ 34   | 0.86/0.68  |        | 7/2    | 0.54/0.15  |  |     |           |

**Table S6.** Length of PCGs in the mitogenomes of the Melyridae species

| gene  | Length of PCGs           |                              |                        |                      |
|-------|--------------------------|------------------------------|------------------------|----------------------|
|       | <i>Cordylepherus</i> sp. | <i>Clanoptilus assimilis</i> | <i>Malachiinae</i> sp. | <i>Dasytinae</i> sp. |
| atp6  | 660                      | 666                          | 666                    | 681                  |
| atp8  | 159                      | 159                          | 156                    | 156                  |
| cox1  | 1498                     | 1545                         | 1545                   | 1545                 |
| cox2  | 681                      | 681                          | 679                    | 682                  |
| cox3  | 783                      | 786                          | 786                    | 786                  |
| cytb  | 1135                     | 1137                         | 1131                   | 1140                 |
| nad1  | 948                      | 948                          | 942                    | 948                  |
| nad2  | 979                      | 1008                         | 978                    | 1011                 |
| nad3  | 346                      | 357                          | 357                    | 357                  |
| nad4  | 1331                     | 1332                         | 1324                   | 1336                 |
| nad4L | 258                      | 276                          | 273                    | 285                  |
| nad5  | 1711                     | 1711                         | 1705                   | 1734                 |
| nad6  | 507                      | 504                          | 504                    | 498                  |

**Table S7.** AT content in the mitogenomes of Melyridae species

| gene                            | A + T Content            |                              |                        |                      |
|---------------------------------|--------------------------|------------------------------|------------------------|----------------------|
|                                 | <i>Cordylepherus</i> sp. | <i>Clanoptilus assimilis</i> | <i>Malachiinae</i> sp. | <i>Dasytinae</i> sp. |
| Full genome                     | 81.1                     | 77.8                         | 79.7                   | 79.2                 |
| PCGs                            | 79.3                     | 77.7                         | 77.9                   | 77.6                 |
| tRNAs                           | 81.7                     | 81.9                         | 82                     | 80.7                 |
| 1 <sup>st</sup> condon position | 73.71                    | 72.96                        | 73.81                  | 71.82                |
| 2 <sup>nd</sup> condon position | 70.58                    | 70.73                        | 70.58                  | 69.24                |
| 3 <sup>rd</sup> condon position | 93.67                    | 89.44                        | 89.35                  | 91.56                |
| atp6                            | 79.1                     | 77.8                         | 77.7                   | 76.2                 |
| atp8                            | 91.2                     | 86.2                         | 87.8                   | 84.0                 |
| cox1                            | 70.1                     | 69.2                         | 69.3                   | 69.2                 |
| cox2                            | 76.8                     | 76.1                         | 76.1                   | 73                   |
| cox3                            | 75.2                     | 73.6                         | 73.5                   | 73.1                 |
| cytb                            | 75.5                     | 73.1                         | 74.8                   | 73.9                 |
| nad1                            | 80.0                     | 78.4                         | 78.4                   | 78.7                 |
| nad2                            | 83.4                     | 79.6                         | 81.2                   | 81.1                 |

---

|       |      |      |      |      |
|-------|------|------|------|------|
| nad3  | 80.9 | 82.1 | 82.1 | 79.9 |
| nad4  | 83.4 | 81.3 | 81.3 | 81.9 |
| nad4L | 82.6 | 82.9 | 81.3 | 81.4 |
| nad5  | 83.3 | 81.7 | 81.1 | 81.5 |
| nad6  | 85.4 | 86.1 | 86.1 | 86.2 |

---
